# Supplementary material for: Genetic analysis of antixenosis resistance to the common cutworm (Spodoptera litura Fabricius) and its relationship with pubescence characteristics in soybean (Glycine max (L.) Merr.)
Source: PubMed Central journal article supplement — Breed Sci. 2012 Feb 4;61(5):608–17. doi: 10.1270/jsbbs.61.608 (PMC3406796; doi:10.1270/jsbbs.61.608), 2012-02-04
Supplement: 61_608_1.pdf [file 61_608_1.pdf]

**Supplemental Table 1.** The sequences of SSR markers designed for the analysis

| Primer name | Forward                    | Reverse                     |
|-------------|----------------------------|-----------------------------|
| CCW1_1      | CAAACAAATGACCCCTAACCA      | TTGACCACCTTACAAGAAGTAAAAA   |
| CCW1_15     | GGGAAACAGGGCAAGGAAC        | CAAGTGTTGTCTCGAATGGAAA      |
| Gm10_1      | CGCATATTCATACATAGGCACA     | AATTTGTCCCTCCAGATATATTTATTA |
| LGH_1       | TAGGACTTGTATTGGCAAGA       | TAAGCCATGGTACTCATCAG        |
| LGH_2       | CAATTTGCCTTTAGCCATAG       | ATAGACTAACAGTGGTGAGA        |
| Gm12_3      | TTGCAAGATGAGACCCAACA       | GAGAATCAGAATCCTGGATAGGAA    |
| Gm12_10     | CAACTTTTCTTGCCCAACT        | TCATCAAAAACCTTAGTGAAGCTGAA  |
| Gm14_1      | CGCGTGGAAGAAACGTAGTC       | CGATAAGATTATGAGATATTCCTCAA  |
| Gm14_5      | TTTGTGGACAAAATAGGACACG     | TGCAATATCTGGCAGAATAAAA      |
| Gm16_2      | TTGGTATAGTCATATTTTGGGTACAA | AAAAATGTTGACCAATCCGATAA     |
| Gm16_3      | CCCCAAATTCTCAATCTGCT       | TTAGAGGCCATGTTGCTGAA        |
| Gm17_3      | GCATGATTGTTGCTTATCGAG      | TTTTTGAATACCTATTAGTCCACTTCA |
